# Supplementary material for: Plasma Expression of Carotid Plaque Presence-Related MicroRNAs Is Associated with Inflammation in Patients with Rheumatoid Arthritis
Source: MDPI journal article supplement (doi:10.3390/ijms242015347), 2023-10-19
Supplement: s1 [file s1]

|                                              | <b>RA</b><br>(n = 199) | <b>Controls</b><br>(n = 64) | <b>Metabolic diseases</b><br>(n = 82) | <b>p</b> |
|----------------------------------------------|------------------------|-----------------------------|---------------------------------------|----------|
| Sex – female<br>(%, n)                       | 66%, 132               | 78%, 50                     | 70.73%, 58                            | 0.20     |
| Age<br>(years, SD)                           | 57.8 (12.4)            | 51.23 (9.12)                | 62.76 (11.89)                         | <0.001   |
| Body mass index<br>(kg/m <sup>3</sup> , IQR) | 26.80 (23.24 – 31.19)  | 24.58 (21.65 – 27.32)       | 26.56 (23.34 – 29.69)                 | <0.001   |
| Waist circumference<br>(cm, SD)              | 91.88 (15.11)          | 86.28 (10.31)               | 95.55 (13.92)                         | <0.001   |
| SBP<br>(mmHg, IQR)                           | 135 (120 – 150)        | 120 (110 – 130)             | 135 (123 – 149.8)                     | <0.001   |
| DBP<br>(mmHg, SD)                            | 81.17 (12.42)          | 72.50 (9.70)                | 80 (10.33)                            | <0.001   |
| LDL cholesterol<br>(mg/dL, SD)               | 118.6 (31.73)          | 114.4 (22.12)               | 124 (31.52)                           | 0.15     |
| HDL cholesterol<br>(mg/dL, IQR)              | 66 (53.50 – 75)        | 69 (59.75 – 77.25)          | 62 (49.5 – 75)                        | 0.17     |
| Tryglycerides<br>(mg/dL, IQR)                | 92 (69 – 127.5)        | 76 (57 – 93.25)             | 93.5 (75 – 141.5)                     | <0.001   |
| Glucose<br>(mg/dL, IQR)                      | 93.87 (22.77)          | 90.75 (8.37)                | 97.23 (15)                            | 0.13     |
| Current smoker<br>(%, n)                     | 27%, 54                | 15.62%, 10                  | 9.75%, 8                              | 0.003    |
| Hypertension<br>(%, n)                       | 59.29%, 118            | 10.93%, 7                   | 60.97%, 50                            | <0.001   |
| Diabetes mellitus<br>(%, n)                  | 11.55%, 23             | 0%, 0                       | 6.10%, 5                              | 0.01     |
| Dyslipidaemia<br>(%, n)                      | 40.70%, 81             | 0%, 0                       | 63.41%, 52                            | <0.001   |
| ESR<br>(mm/h, IQR)                           | 31 (18.50 – 50.50)     | 9.50 (5 – 14.25)            | 16 (9 – 26.50)                        | <0.001   |
| CRP<br>(mg/dL, IQR)                          | 0.5 (0.2 – 0.9)        | 0.19 (0.06 – 0.2)           | 0.20 (0.07 – 0.25)                    | <0.001   |

|                           |                |                        |                   |        |
|---------------------------|----------------|------------------------|-------------------|--------|
| Fibrinogen<br>(mg/dL, SD) | 445.64 (96.53) | 313.3 (281 –<br>332.8) | 344.8 (290 – 393) | <0.001 |
|---------------------------|----------------|------------------------|-------------------|--------|

**Supplementary Table 1:** Description of the general characteristics of the RA cohort, the control subjects and the patients with metabolic disorders. Normally distributed data is expressed in terms of mean and standard deviation (SD). Non-normally distributed data is expressed in terms of median and interquartile range (IQR). Categorical data is expressed in percentages. To evaluate differences between groups, ANOVA was used to compare normally distributed data and Kruskal-wallis was used to compare non-parametric data. Chi square ( $X^2$ ) test was used to compare categorical data. P-values < 0.05 are considered statistically significant. n=number of individuals, SBP=systolic blood pressure, DBP=diastolic blood pressure, ESR=erythrocyte sedimentation rate, CRP=C-reactive protein, p=p value.

| Control group (n = 64)   |         |         |
|--------------------------|---------|---------|
| ESR                      |         |         |
|                          | $\beta$ | p-value |
| MiRNA-24                 | -0.45   | 0.65    |
| MiRNA-146                | -0.44   | 0.30    |
| MiRNA-Let7a              | -1.15   | 0.10    |
| CRP                      |         |         |
|                          | $\beta$ | p-value |
| MiRNA-24                 | 0.051   | 0.20    |
| MiRNA-146                | -0.002  | 0.9     |
| MiRNA-Let7a              | 0.01    | 0.65    |
| Metabolic group (n = 82) |         |         |
| ESR                      |         |         |
|                          | $\beta$ | p-value |
| MiRNA-24                 | -0.78   | 0.47    |
| MiRNA-146                | -1.18   | 0.14    |
| MiRNA-Let7a              | -0.91   | 0.33    |
| CRP                      |         |         |
|                          | $\beta$ | p-value |
| MiRNA-24                 | 0.04    | 0.052   |
| MiRNA-146                | 0.007   | 0.59    |
| MiRNA-Let7a              | 0.026   | 0.11    |

**Supplementary Table 2:** Summaries of the multivariate lineal regression models to estimate the associations between miRNAs and ESR and CRP in the control group and in metabolic subjects. All the basal models are adjusted for age, sex and body mass index. ESR = erythrocyte sedimentation rate, CRP = C reactive protein,  $\beta$  = beta coefficient, AUC = area under the curve, AIC = Akaike information Criteria, T3 = 3rd tertile.
